# Supplementary material
Source: MDPI journal article supplement (https://www.mdpi.com/2218-0532/91/1/2)
Supplement: s1 [file s1 › scipharm-2047645-supplementary.pdf]

## Supplementary Material

### *In Vitro* and *In Silico* Screening Analysis of *Artabotrys sumatranus* Leaf and Twig Extracts for $\alpha$ -Glucosidase Inhibition Activity and Its Relationship with Antioxidant Activity

#### 1. Calibration curve for total phenolic content

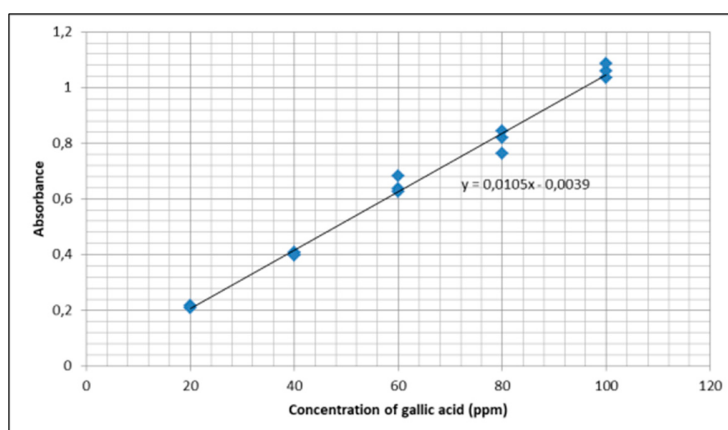

**Figure S1.** Calibration curve of gallic acid equivalent (GAE) for total phenolic content

#### 2. Calibration curve for total flavonoid content

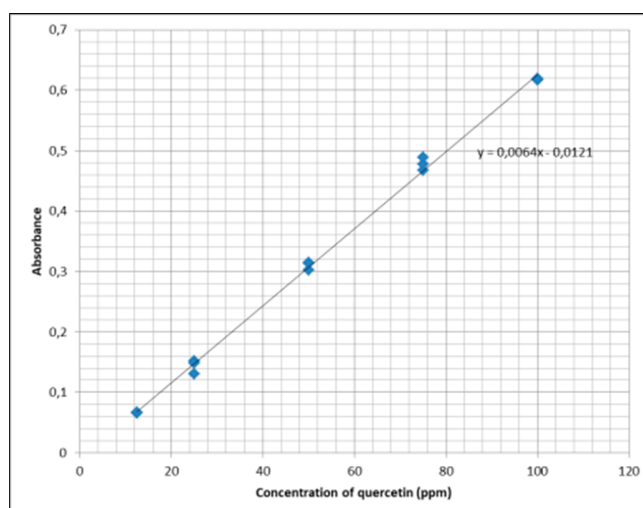

**Figure S2.** Calibration curve of quercetin equivalent (QE) for total flavonoid content

### 3. Calibration curve for FRAP method

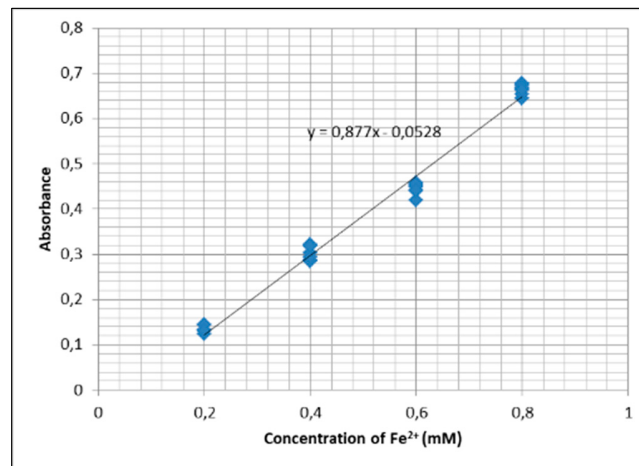

**Figure S3.** Calibration curve of iron (II) sulphate
